# Supplementary material
Source: PubMed Central journal article supplement (PMC3587168)
Supplement: NIHMS441239-supplement-Supplementary_Materials.pdf [file NIHMS441239-supplement-Supplementary_Materials.pdf]

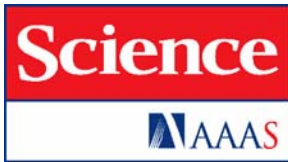

Supplementary Materials for  
**Bacterial Quorum Sensing and Metabolic Incentives to Cooperate**

Ajai A. Dandekar, Sudha Chugani, E. Peter Greenberg\*

\*To whom correspondence should be addressed. E-mail: [epgreen@u.washington.edu](mailto:epgreen@u.washington.edu)

Published 12 October 2012, *Science* **338**, 264 (2012)

DOI: 10.1126/science.1227289

**This PDF file includes**

Materials and Methods  
Fig. S1  
Tables S1 and S2  
Full References

**Materials and Methods:**

**Bacteria and growth conditions.** We used the following *P. aeruginosa* strains: PAO1; CI27 and CIG1, both cystic fibrosis clinical isolates; and the environmental isolates BE171, BE173, BE177, and PaE2 (20, 21). Quorum sensing mutants of these isolates have been described in (15). All experiments on the emergence or restraint of social cheaters were patterned after those described by Sandoz et al (5). We used a slightly different minimal medium (22) with carbon and energy sources added as indicated. For experiments with casein and adenosine as nitrogen sources we used M9 medium without (or with as a control) ammonium chloride. Briefly, to start an experiment, we used a starter culture grown in LB broth buffered with 50 mM MOPS, pH 6.8. The initial optical density was 0.01 at 600 nm. At 24 h intervals fresh medium was inoculated to a starting optical density of 0.01. We preserved day-25 samples from various experiments by freezing aliquots in an equal volume of 50% glycerol. We patched colonies onto skim milk and adenosine agar at 5-day intervals. These media have been described elsewhere (5).

**Phenotypic profiling.** We used a Phenotype MicroArray (PM) system (Biolog, Hayward, CA) for metabolic profiling according to the manufacturer's instructions to identify metabolic capabilities activated by addition of quorum sensing signals to quorum sensing-signal-generation mutants. Plates were incubated without shaking at 37°C in an OmniLog instrument. Where indicated, cell suspensions used as inocula for the PM analysis were supplemented with 2  $\mu$ M of C12-HSL and 10  $\mu$ M C4-HSL. Respiration-dependent color changes in each well of the microtiter plate were measured at 15-min intervals for 48 h. Construction of the quorum sensing mutants is described elsewhere (15).

**DNA sequencing.** We grew cells overnight in 5 ml of LB broth, collected cells by centrifugation and extracted cellular DNA by using a Puregene cell extraction kit (Gentra). To sequence *lasR* we used primers described elsewhere to amplify full length *lasR* and flanking regions (1557669 - 1558902) (13).

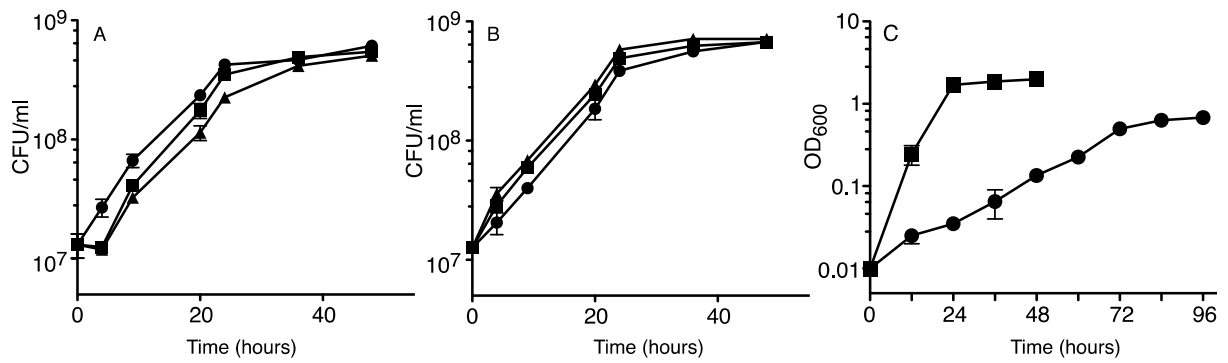

Figure S1. Growth curves of *P. aeruginosa* PAO1 stock culture or *P. aeruginosa* after 25 days of transfer and growth in different media. In all cases growth was logarithmic for at least 24 h. (A) *P. aeruginosa* PAO1 (from stock culture) grown in 1% casein (circles), 0.5% adenosine plus 0.5% casein (squares), and 0.25% casein plus 0.75% adenosine (triangles). (B) *P. aeruginosa* from a day-25 culture grown in 0.25% casein plus 0.75% adenosine (the symbols are the same as in panel A). (C) *P. aeruginosa* PAO1 from stock culture (circles) and an isolate from a day-25 0.25% casein-0.75% adenosine culture (squares) grown in 1% adenosine (without casein).

Table S1. Growth of *Pseudomonas aeruginosa* MW1 (*LasI/RhlI*) with or without added signal in the presence of 380 nitrogen sources.

Nitrogen sources that do not support growth with or without added signal

D-Ala-Gly-Gly, D,L- $\alpha$ -Amino-Caprylic acid, D,L- $\alpha$ -Amino-N-Butyric acid, e-Amino-N-Caproic acid, N-Amylamine, D-Aspartic acid, Biuret, N-Butylamine, L-Cysteine, Ethylamine, Ethylenediamine, D-Galactosamine,  $\gamma$ -D-Glu-Gly, D-Glucosamine, Gly-D-Asp, Gly-D-Thr, Gly-D-Val, Gly-Gly-D-Leu, L-Homoserine, Hydroxylamine, Ile-Met, Ile-Trp, Leu-D-Leu, D-Leu-D-Leu, D-Leu-Gly, Leu-Leu-Leu, D-Leu-Tyr, D-Mannosamine, Met-Glu, Met-Ile, Met-Leu, Met-Met, Met-Phe, Methylamine, Phe-Trp, Phe-Tyr, Pro-Hyp, Pro-Trp, Thymidine, Trp-Asp, Trp-Glu, Trp-Phe, Tyr-Ile, Val-Tyr-Val

Nitrogen sources that support growth only in the absence of added signal

Gly-D-Ser

Nitrogen sources that support growth only in the presence of added signal

Glu-Tyr, His-Trp, Tyr-Gly-Gly, Tyr-Phe, Tyr-Trp, Tyr-Tyr

Nitrogen sources that support growth in the presence or absence of signal

Acetamide, N-Acetyl-D-Galactosamine, N-Acetyl-D-Glucosamine, N-Acetyl-D-Mannosamine, N-Acetyl-L-Glutamic acid, Adenine, Adenosine, Agmatine, Ala-Ala, Ala-Ala-Ala, Ala-Arg, Ala-Asn, Ala-Asp, Ala-Asp, D-Ala-D-Ala, Ala-Gln, Ala-Gln, Ala-Glu, Ala-Glu, D-Ala-Gly, Ala-Gly, Ala-Gly,  $\beta$ -Ala-His, Ala-His, Ala-His, Ala-Ile, D-Ala-Leu, Ala-Leu, Ala-Leu, Ala-Lys, Ala-Met, Ala-Phe, Ala-Pro, Ala-Ser, Ala-Thr, Ala-Thr, Ala-Trp, Ala-Tyr, Ala-Val, L-Alanine, Allantoin, Alloxan,  $\gamma$ -Amino-N-Butyric acid,  $\alpha$ -Amino-N-Valeric acid, d-Amino-N-Valeric acid, Ammonia, Arg-Ala, Arg-Arg, Arg-Asp, Arg-Gln, Arg-Glu, Arg-Ile, Arg-Leu, Arg-Lys, Arg-Met, Arg-Phe, Arg-Ser, Arg-Trp, Arg-Tyr, Arg-Val, L-Arginine, Asn-Glu, Asn-Val, Asp-Ala, Asp-Asp, Asp-Gln, Asp-Glu, Asp-Gly, Asp-Leu, Asp-Lys, Asp-Phe, Asp-Trp, Asp-Val, D-Asparagine, L-Asparagine, L-Aspartic acid,  $\beta$ -Ala-Ala,  $\beta$ -Ala-Gly,  $\beta$ -Ala-Phe, L-Citrulline, Cys-Gly, Cytidine, Cytosine, D-Alanine, Ethanolamine, Formamide, Gln-Gln, Gln-Glu, Gln-Gly, Glu-Ala, Glu-Asp, Glu-Glu,  $\gamma$ -Glu-Gly,  $\gamma$ -Glu-Gly, Glu-Gly, Glu-Ser, Glu-Trp, Glu-Val, Glucuronamide, D-Glutamic acid, L-Glutamic acid, L-Glutamine, L-Glutamine, L-Glutamine, L-Glutamine, Gly-Ala, Gly-Arg, Gly-Asn, Gly-Asn, Gly-Asp, Gly-Cys, Gly-D-Ala, Gly-Gln, Gly-Glu, Gly-Gly, Gly-Gly-Ala, Gly-Gly-Gly, Gly-Gly-Ile, Gly-Gly-Leu, Gly-Gly-Phe, Gly-His, Gly-Ile, Gly-Leu, Gly-Lys, Gly-Met, Gly-Met, Gly-Phe, Gly-Phe-Phe, Gly-Pro, Gly-Ser, Gly-Thr, Gly-Trp, Gly-Tyr, Gly-Val, Glycine, Guanine, Guanosine, His-Ala, His-Asp, His-Glu, His-Gly, His-His, His-Leu, His-Lys, His-Met, His-Pro, His-Ser, His-Tyr, His-Val, Histamine, L-Histidine, Ile-Ala, Ile-Arg, Ile-Asn, Ile-Gln, Ile-Gly, Ile-His, Ile-Ile, Ile-Leu, Ile-Phe, Ile-Pro, Ile-Ser, Ile-Tyr, Ile-Val, Inosine, L-Isoleucine, D,L-Lactamide, Leu-Ala, Leu-Arg, Leu-Asn, Leu-Asp, Leu- $\beta$ -Ala, Leu-Glu, Leu-Gly, Leu-Gly-Gly, Leu-His, Leu-Ile, Leu-Leu, Leu-Met, Leu-Phe, Leu-Pro, Leu-Ser, Leu-Trp, Leu-Tyr, Leu-Val, L-Leucine, Lys-Ala, Lys-Arg, Lys-Asp, Lys-Glu, Lys-Gly, Lys-Ile, Lys-Leu, Lys-Lys, Lys-Met, Lys-Phe, Lys-Pro, Lys-Ser, Lys-Thr, Lys-Trp, Lys-Tyr, Lys-Val, D-Lysine, L-Lysine, Met-Ala, Met-Arg, Met-Asp, Met- $\beta$ -Ala, Met-Gln, Met-Gly, Met-His, Met-Lys, Met-Pro, Met-Thr, Met-Trp, Met-Tyr, Met-Val, L-Methionine, Nitrate, Nitrite, L-Ornithine, Parabanic acid, Phe-Ala, Phe-Asp, Phe- $\beta$ -Ala, Phe-Glu, Phe-Gly, Phe-Gly-Gly, Phe-Ile, Phe-Met, Phe-Phe, Phe-Pro, Phe-Ser, Phe-Val, L-Phenylalanine,  $\beta$ -Phenylethylamine, N-Phthaloyl-L-Glutamic acid, Pro-Ala, Pro-Arg, Pro-Asn, Pro-Asp, Pro-Gln, Pro-Glu, Pro-Gly, Pro-Leu, Pro-Ile, Pro-Lys, Pro-Phe, Pro-Pro, Pro-Ser, Pro-Tyr, Pro-Val, L-Proline, Putrescine, L-Pyroglutamic acid, Ser-Ala, Ser-Asn, Ser-Asp, Ser-Gln, Ser-Glu, Ser-Gly, Ser-His, Ser-Leu, Ser-Met, Ser-Phe, Ser-Pro, Ser-Ser, Ser-Tyr,

Ser-Val, D-Serine, L-Serine, Thr-Ala, Thr-Arg, Thr-Asp, Thr-Gln, Thr-Glu, Thr-Gly, Thr-Leu, Thr-Met, Thr-Phe, Thr-Pro, Thr-Ser, L-Threonine, Thymine, Trp-Ala, Trp-Arg, Trp-Gly, Trp-Leu, Trp-Lys, Trp-Ser, Trp-Trp, Trp-Tyr, Trp-Val, L-Tryptophan, Tyr-Ala, Tyr-Gln, Tyr-Glu, Tyr-Gly, Tyr-His, Tyr-Leu, Tyr-Lys, Tyr-Val, Tyramine, L-Tyrosine, Uracil, Urea, Uric acid, Uridine, Val-Ala, Val-Arg, Val-Asn, Val-Asp, Val-Gln, Val-Glu, Val-Gly, Val-His, Val-Ile, Val-Leu, Val-Lys, Val-Met, Val-Phe, Val-Pro, Val-Ser, Val-Tyr, Val-Val, D-Valine, L-Valine, Xanthine, Xanthosine

Table S2. Growth of *Pseudomonas aeruginosa* MW1 (*LasI-RhlI*-) with or without added signal in the presence of 190 carbon sources.

Carbon sources that do not support growth with or without added signal

Acetamide, Acetoacetic acid, N-Acetyl-D-Galactosamine, N-Acetyl-D-Glucosaminitol, N-Acetyl-D-Mannosamine, N-Acetyl-Neuraminic acid, Adenosine, Adonitol, Ala-Gly, L-Alaninamide,  $\beta$ -D-Allose, Amygdalin, D-Arabinose, L-Arabinose, D-Arabitol, L-Arabitol, Arbutin, D-Aspartic acid, sec-Butylamine, 2, 3-Butanediol, 2, 3-Butanone, Capric acid, D-Cellobiose, Chondroitin Sulfate C, Citraconic acid,  $\alpha$ -Cyclodextrin,  $\beta$ -Cyclodextrin,  $\gamma$ -Cyclodextrin, 2-Deoxy-D-Ribose, 2'-Deoxyadenosine, Dextrin, Dihydroxyacetone, Dulcitol, i-Erythritol, Formic acid, D-Fructose-6-Phosphate, D-Fucose, L-Fucose, D-Galactonic acid- $\gamma$ -Lactone, L-Galactonic acid- $\gamma$ -Lactone, D-Galactose, 3-O- $\beta$ -D-Galactopyranosyl-D-Arabinose, D-Galacturonic acid, Gelatin, Gentiobiose, D-Glucosaminic acid, D-Glucosamine, L-Glucose, D-Glucose-1-Phosphate, D-Glucose-6-Phosphate, D-Glucuronic acid, Glucuronamide, Gly-Glu, Gly-Asp, D,L- $\alpha$ -Glycerol Phosphate, Glycine, Glycogen, Glycolic acid, Glyoxylic acid, L-Homoserine, 2-Hydroxybenzoic acid,  $\gamma$ -Hydroxybutyric acid, 3-Hydroxy-2-butanone,  $\alpha$ -Hydroxybutyric acid,  $\alpha$ -Hydroxyglutaric acid- $\gamma$ -Lactone, m-Hydroxyphenyl Acetic acid, m-Inositol, Inulin,  $\alpha$ -Ketobutyric acid, 5-Keto-D-Gluconic acid,  $\alpha$ -Keto-Valeric acid, D-Lactic acid Methyl Ester, D-Lactitol,  $\alpha$ -D-Lactose, Lactulose, Laminarin, L-Lyxose, D-Malic acid, Maltitol, Maltose, Maltotriose, Mannan, D-Mannose, D-Melezitose, Melibionc acid, D-Melibiose, L-Methionine,  $\alpha$ -Methyl-D-Galactoside,  $\beta$ -Methyl-D-Galactoside,  $\alpha$ -Methyl-D-Glucoside,  $\beta$ -Methyl-D-Glucoside,  $\beta$ -Methyl-D-Glucuronic acid, 3-Methylglucose,  $\alpha$ -Methyl-D-Mannoside,  $\beta$ -Methyl-D-Xyloside, Mucic acid, Oxalic acid, Oxalomalic acid, Palatinose, Pectin, Phenylethylamine, 1, 2-Propanediol, D-Raffinose, L-Rhamnose, D-Ribono-1, 4-Lactone, D-Ribose, D-Saccharic acid, Salicin, Sedoheptulosan, D-Serine, L-Serine, D-Sorbitol, Sorbic acid, L-Sorbose, Stachyose, Sucrose, D-Tagatose, D-Tartaric acid, L-Tartaric acid, m-Tartaric acid, Turanose, D-Threonine, Thymidine, Tricarballic acid, Uridine, L-Valine, Xylitol, D-Xylose

Carbon sources that support growth only in the absence of added signal

Butyric acid, L-Lysine, L-Phenylalanine, Sebacic acid, L-Threonine

Carbon sources that support growth only in the presence of added signal

Inosine, D-Trehalose

Carbon sources that support growth in the presence or absence of signal

Acetic acid, N-Acetyl-D-Glucosamine, N-Acetyl-L-Glutamic acid,  $\gamma$ -Amino-N-Butyric acid, d-Amino Valeric acid, D-Alanine, L-Alanine, 2-Aminoethanol, L-Arginine, L-Asparagine, L-Aspartic acid, Bromosuccinic acid, Caproic acid, D,L-Carnitine, D,L-Citramalic acid, Citric acid, D-Fructose, Fumaric acid, Glycerol,  $\alpha$ -D-Glucose, D-Gluconic acid, L-Glutamic acid, L-Glutamine, Gly-Pro, L-Histidine, 4-Hydroxybenzoic acid,  $\beta$ -Hydroxybutyric acid, p-Hydroxyphenyl Acetic acid, Hydroxy-L-Proline, L-Isoleucine, Itaconic acid,  $\alpha$ -Ketoglutaric acid, L-Lactic acid, L-Leucine, L-Malic acid, D,L-Malic acid, Malonic acid, D-Mannitol, Methylpyruvate, Mono-Methylsuccinate, D,L-Octopamine, L-Ornithine, L-Proline, Propionic acid, D-Psicose, Putrescine, L-Pyroglutamic acid, Pyruvic acid, Quinic acid, Succinamic acid, Succinic acid, Tween 20, Tween 40, Tween 80, Tyramine

## References

1. C. M. Waters, B. L. Bassler, Quorum sensing: Cell-to-cell communication in bacteria. *Annu. Rev. Cell Dev. Biol.* **21**, 319 (2005).
2. W. C. Fuqua, S. C. Winans, E. P. Greenberg, Quorum sensing in bacteria: The LuxR-LuxI family of cell density-responsive transcriptional regulators. *J. Bacteriol.* **176**, 269 (1994).
3. N. A. Whitehead, A. M. Barnard, H. Slater, N. J. Simpson, G. P. Salmond, Quorum-sensing in Gram-negative bacteria. *FEMS Microbiol. Rev.* **25**, 365 (2001).
4. S. P. Diggle, A. S. Griffin, G. S. Campbell, S. A. West, Cooperation and conflict in quorum-sensing bacterial populations. *Nature* **450**, 411 (2007).
5. K. M. Sandoz, S. M. Mitzimberg, M. Schuster, Social cheating in *Pseudomonas aeruginosa* quorum sensing. *Proc. Natl. Acad. Sci. U.S.A.* **104**, 15876 (2007).
6. J. B. Xavier, W. Kim, K. R. Foster, A molecular mechanism that stabilizes cooperative secretions in *Pseudomonas aeruginosa*. *Mol. Microbiol.* **79**, 166 (2011).
7. M. Schuster, E. P. Greenberg, A network of networks: Quorum-sensing gene regulation in *Pseudomonas aeruginosa*. *Int. J. Med. Microbiol.* **296**, 73 (2006).
8. E. C. Pesci, J. P. Pearson, P. C. Seed, B. H. Iglewski, Regulation of *las* and *rhl* quorum sensing in *Pseudomonas aeruginosa*. *J. Bacteriol.* **179**, 3127 (1997).
9. M. Schuster, C. P. Lostroh, T. Ogi, E. P. Greenberg, Identification, timing, and signal specificity of *Pseudomonas aeruginosa* quorum-controlled genes: A transcriptome analysis. *J. Bacteriol.* **185**, 2066 (2003).
10. S. E. Darch, S. A. West, K. Winzer, S. P. Diggle, Density-dependent fitness benefits in quorum-sensing bacterial populations. *Proc. Natl. Acad. Sci. U.S.A.* **109**, 8259 (2012).
11. S. A. West, I. Pen, A. S. Griffin, Cooperation and competition between relatives. *Science* **296**, 72 (2002).
12. P. B. Rainey, K. Rainey, Evolution of cooperation and conflict in experimental bacterial populations. *Nature* **425**, 72 (2003).
13. K. Heurlier *et al.*, Quorum-sensing-negative (*lasR*) mutants of *Pseudomonas aeruginosa* avoid cell lysis and death. *J. Bacteriol.* **187**, 4875 (2005).
14. B. Mellbye, M. Schuster, The sociomicrobiology of antivirulence drug resistance: A proof of concept. *MBio* **2**, e00131-11 (2011).
15. S. Chugani *et al.*, Strain-dependent diversity in the *Pseudomonas aeruginosa* quorum-sensing regulon. *Proc. Natl. Acad. Sci. U.S.A.* 10.1073/pnas.1214128109 (2012).
16. J. M. Brint, D. E. Ohman, Synthesis of multiple exoproducts in *Pseudomonas aeruginosa* is under the control of RhlR-RhlI, another set of regulators in strain PAO1 with homology to the autoinducer-responsive LuxR-LuxI family. *J. Bacteriol.* **177**, 7155 (1995).



17. J. J. Kuzdzal-Fick, S. A. Fox, J. E. Strassmann, D. C. Queller, High relatedness is necessary and sufficient to maintain multicellularity in *Dictyostelium*. *Science* **334**, 1548 (2011).
18. K. R. Foster, G. Shaulsky, J. E. Strassmann, D. C. Queller, C. R. Thompson, Pleiotropy as a mechanism to stabilize cooperation. *Nature* **431**, 693 (2004).
19. M. Kurachi, Studies on the biosynthesis of pyocyanine. Isolation and determination of pyocyanine. *Bull. Inst. Chem. Res. Kyoto Univ.* **36**, 163 (1958).
20. R. K. Ernst *et al.*, Genome mosaicism is conserved but not unique in *Pseudomonas aeruginosa* isolates from the airways of young children with cystic fibrosis. *Environ. Microbiol.* **5**, 1341 (2003).
21. M. C. Wolfgang *et al.*, Conservation of genome content and virulence determinants among clinical and environmental isolates of *Pseudomonas aeruginosa*. *Proc. Natl. Acad. Sci. U.S.A.* **100**, 8484 (2003).
22. M. K. Kim, C. S. Harwood, Regulation of benzoate-CoA ligase in *Rhodospseudomonas palustris*. *FEMS Microbiol. Lett.* **83**, 199 (1991).
